# Supplementary material for: Transcriptome and metabolome analysis of crGART, a novel cell model of de novo purine synthesis deficiency: Alterations in CD36 expression and activity
Source: PubMed Central journal article supplement (PMC8291708; doi:10.1371/journal.pone.0247227), 2021-07-20
Supplement: pone.0247227.s008.pdf [file pone.0247227.s008.pdf]

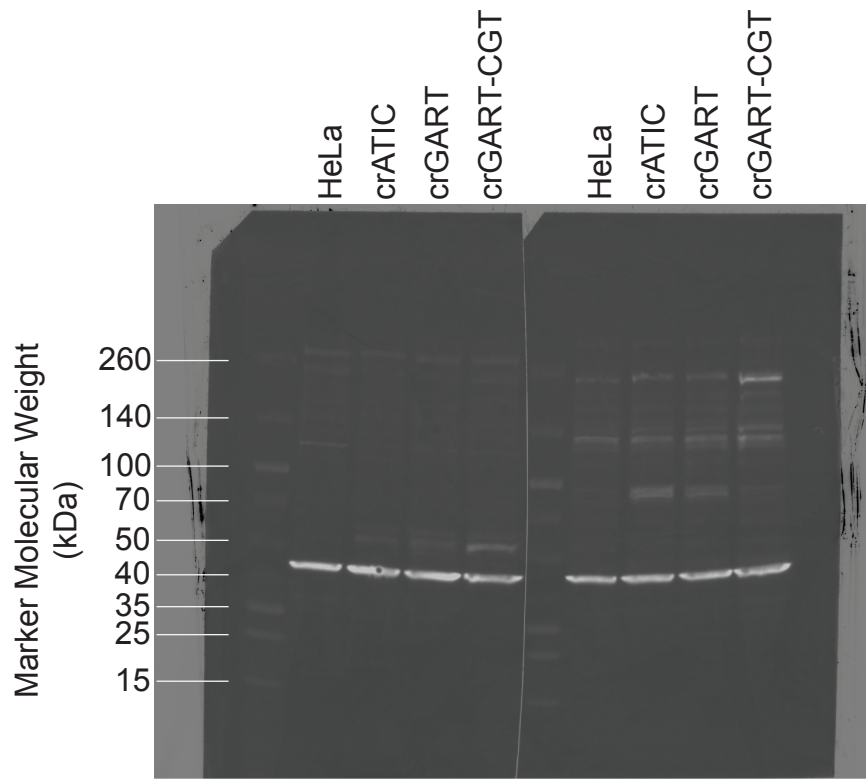

**Raw Images: Figure 5B and 5D:** The top image is a composite of colorimetric (molecular weight standards) and chemiluminescence. The bottom image shows only chemiluminescence. Images were captured using a ChemiDoc Imaging System (Bio-Rad) following the manufacturer's recommendations for chemiluminescence, 4x4 (default) binning and Image Lab software (Bio-Rad). These images have not been altered or adjusted.

| Primary Ab.    | Manufacturer   | Cat. Number | Dilution |
|----------------|----------------|-------------|----------|
| CD36           | Abcam          | ab133625    | 1:500    |
| PPAR $\gamma$  | Cell Signaling | 2430        | 1:250    |
| $\beta$ -actin | Cell Signaling | 8457        | 1:1000   |
